# Supplementary material
Source: PubMed Central journal article supplement (PMC7925349)
Supplement: NIHMS1651263-supplement-1.pdf [file NIHMS1651263-supplement-1.pdf]

**Supplementary Figure 1.** Schematic of total number of samples at 3 time points and breakdown of longitudinal matching

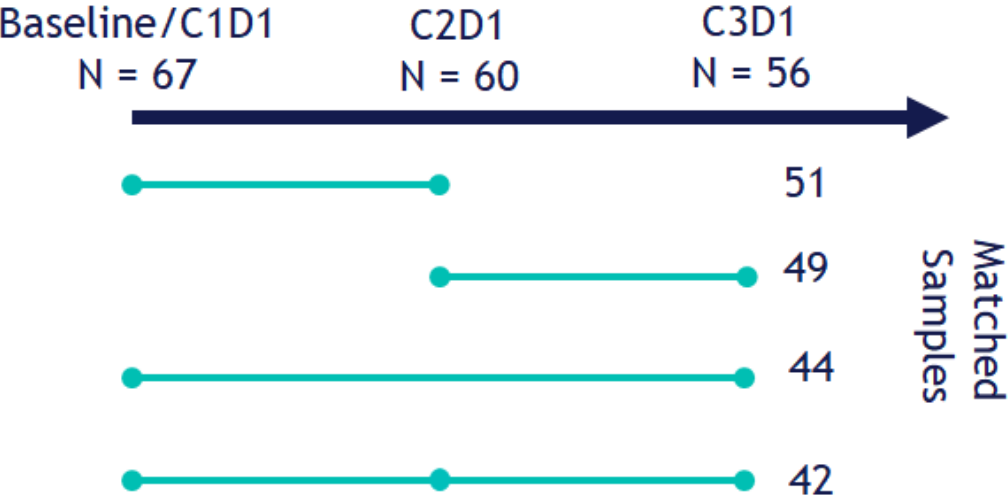

Supplementary Figure 2. CTC Burden and Survival Analysis with Exploratory Cutoffs

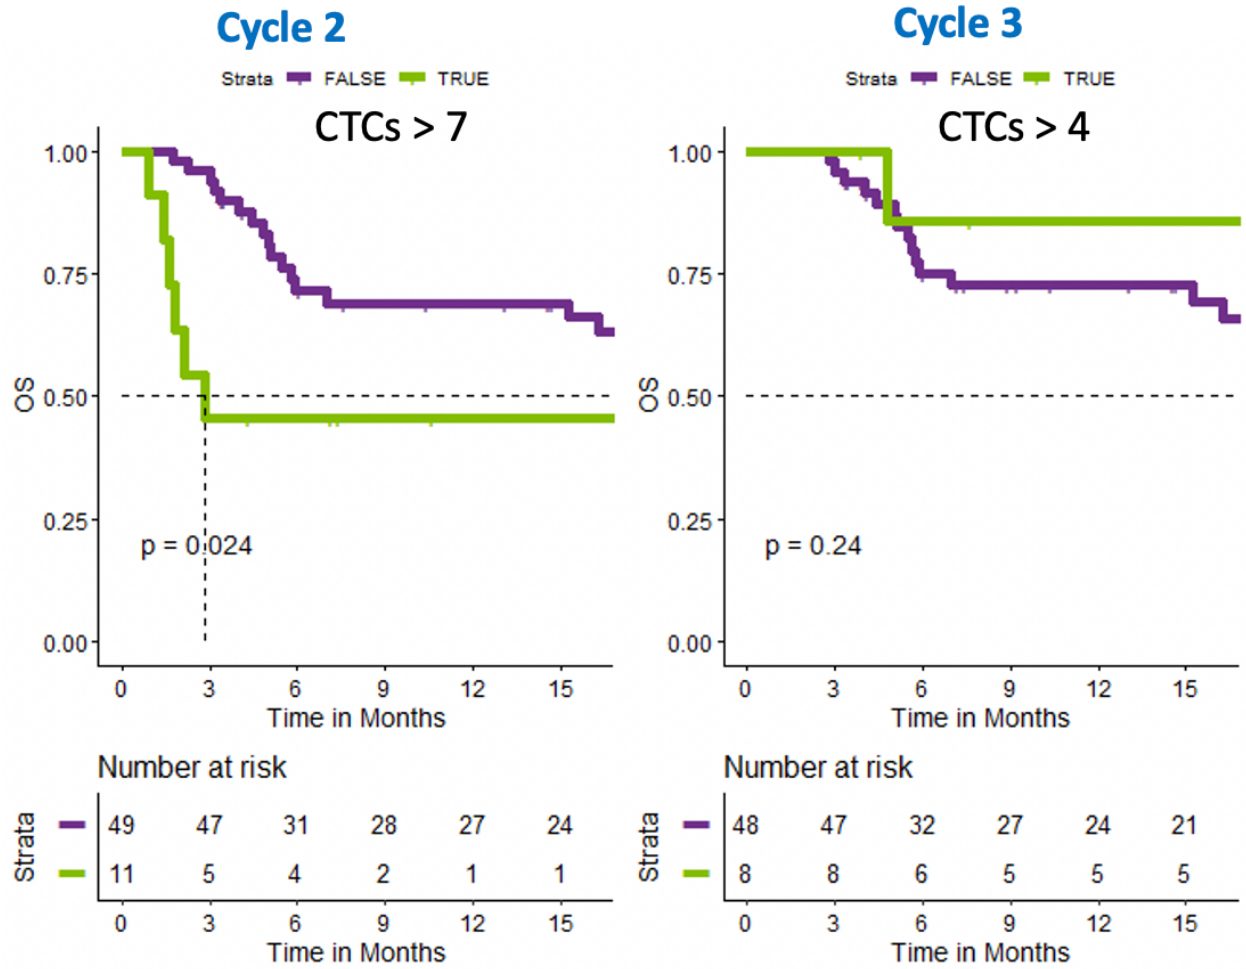

### Supplementary Figure 3. Sub-Analysis Limited to Urothelial Histology

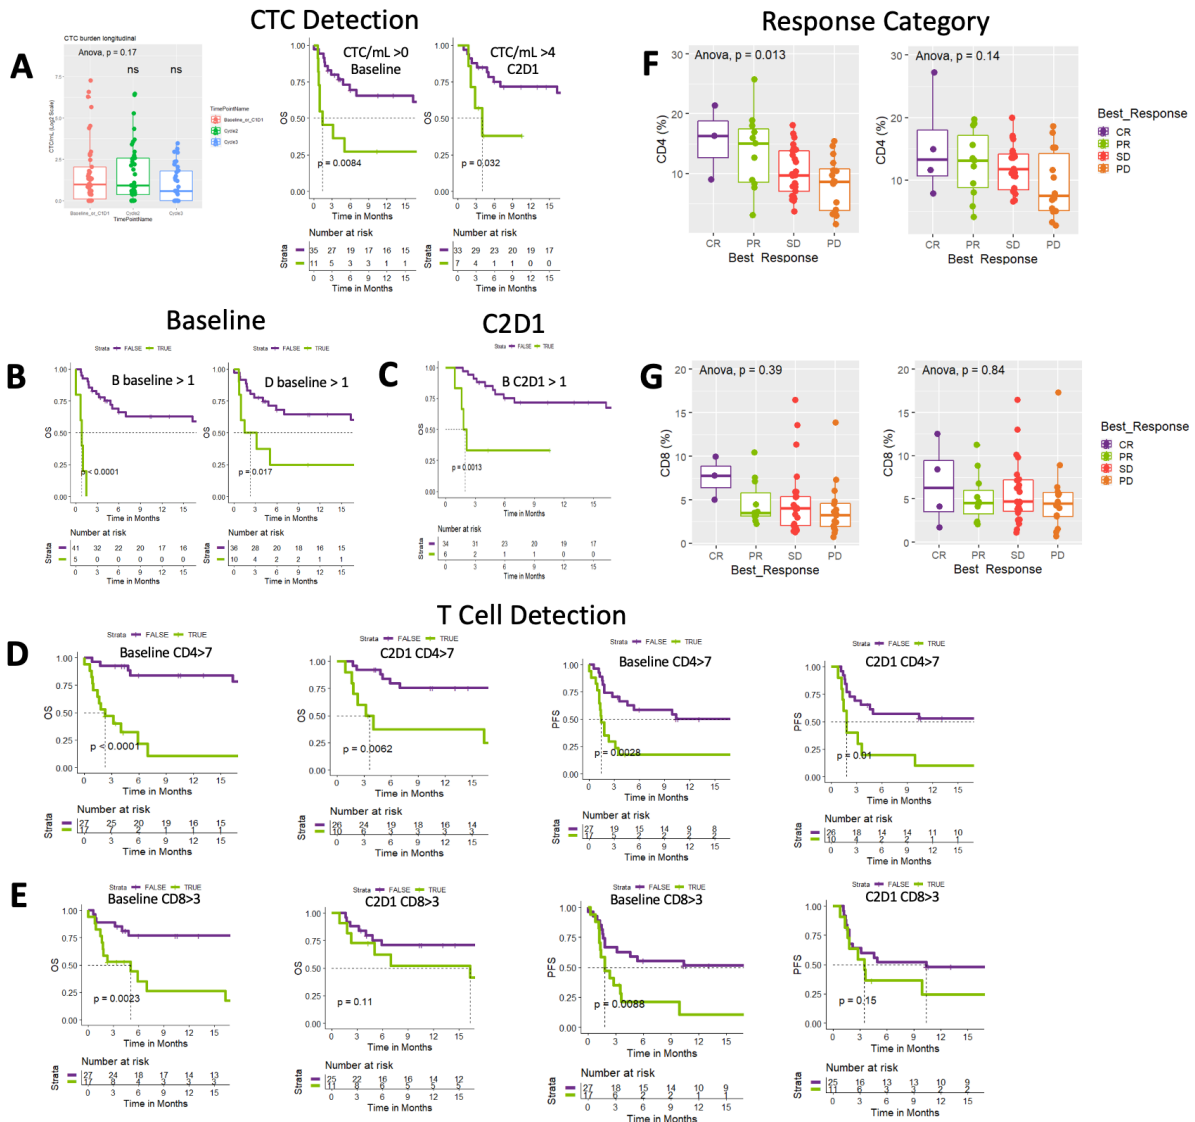

**A)** CTC detection across time points, Kaplan-Meier (KM) curves for OS at baseline with a cutoff of 0 and C2D1 with a cutoff of 4 CTCs. **B)** KM curves for OS for detection of subtypes B and D at baseline. **C)** KM curve for OS for detection of subtype B and C2D1. **D)** OS and PFS at baseline and C2D1 for white blood cells positive for CD4 with cutoff of 7%. **E)** OS and PFS at baseline and C2D1 for white blood cells positive for CD8 with cutoff of 3%. **F,G)** Analysis of variance for CD4+ and CD8+ T-cell populations across the different categories of treatment response (**F** CD4+, **G** CD8+).

**Supplementary Figure 4.** Kaplan-Meier curve for PFS at baseline with PD-L1+ CTC cutoff of 0

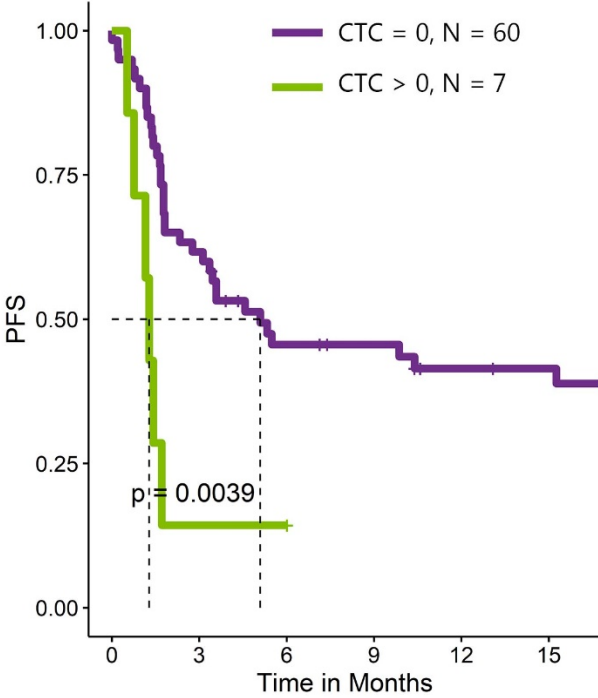

**Supplementary Figure 5.** Kaplan-Meier curve for PFS at baseline with CTC subtype B cutoff of 0

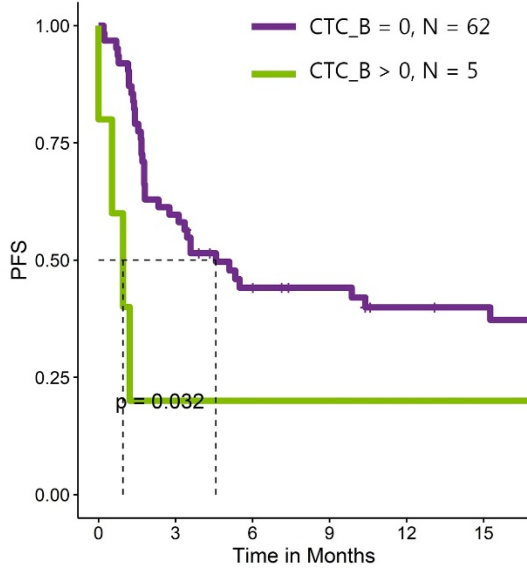

**Supplementary Figure 6.** Kaplan-Meier curve for OS with increasing and decreasing Shannon Index between baseline and C2D1

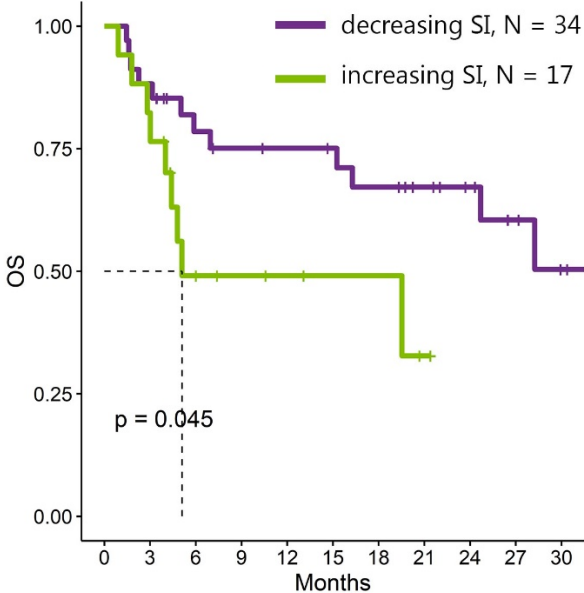

**Supplementary Figure 7.** Internal analysis of morphology-based CTC subtypes and progression-free and overall survival

**A) Cluster B, C2D1, OS, p=0.066**

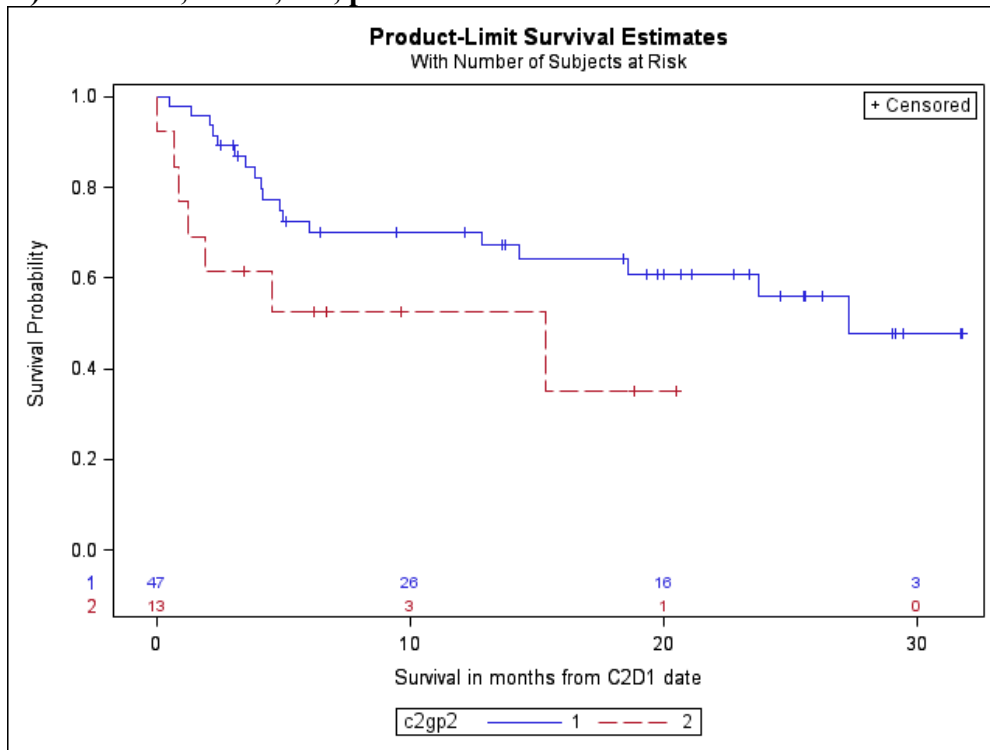

**B) Cluster B, baseline, PFS, p=0.023**

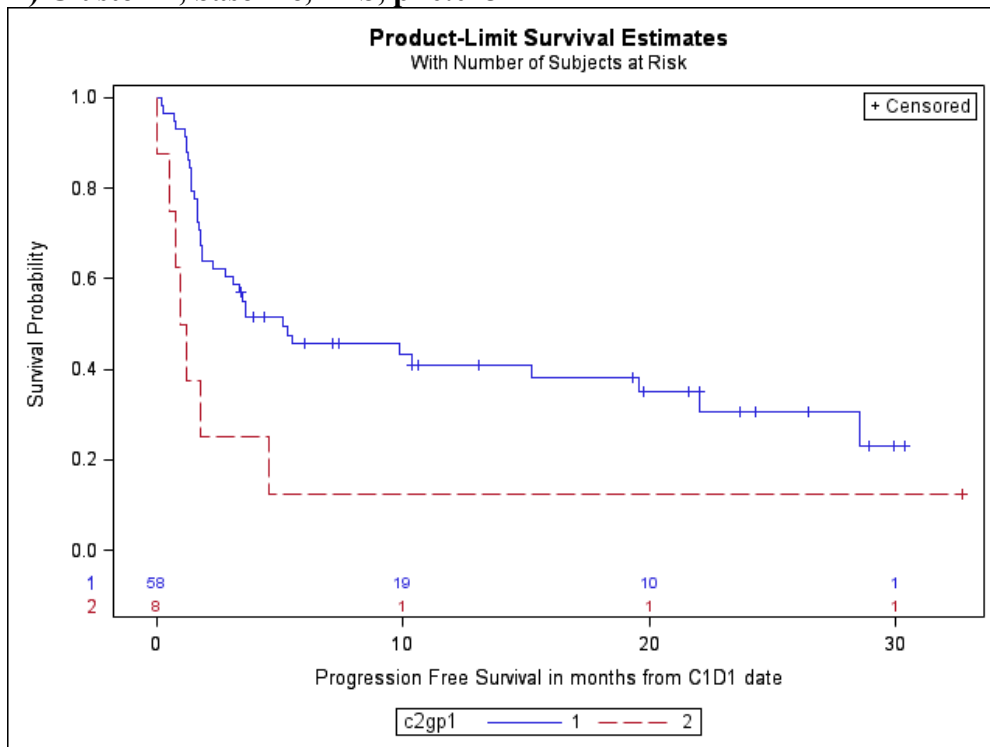

**C) Cluster B, C3D1, PFS, p=0.012**

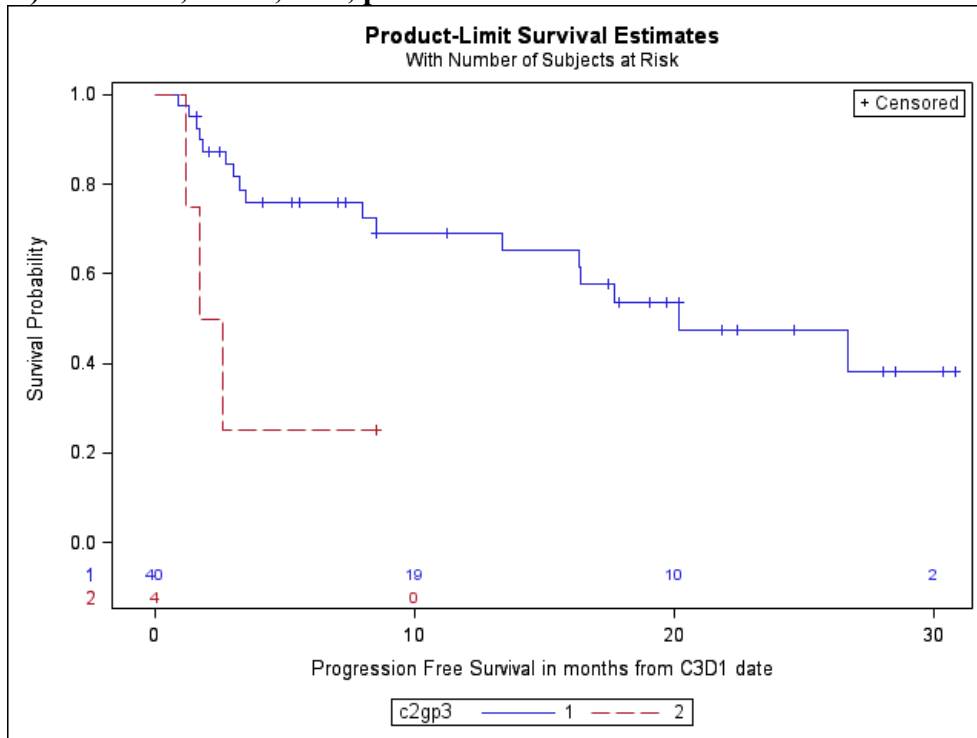

**D) Cluster D, baseline, OS, p=0.020**

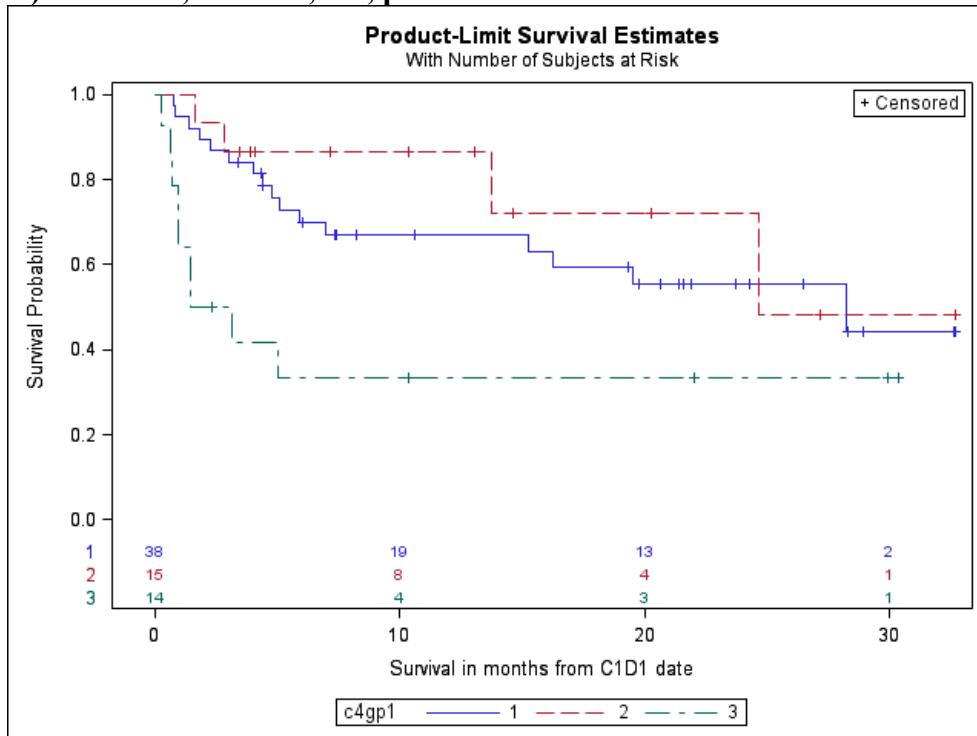

1 vs. 2:  $p = 0.93$ , 1 vs. 3:  $p = 0.072$ , 2 vs. 3:  $p = 0.021$ . Groups 1 and 2 can be pooled and the combination tested against 3.



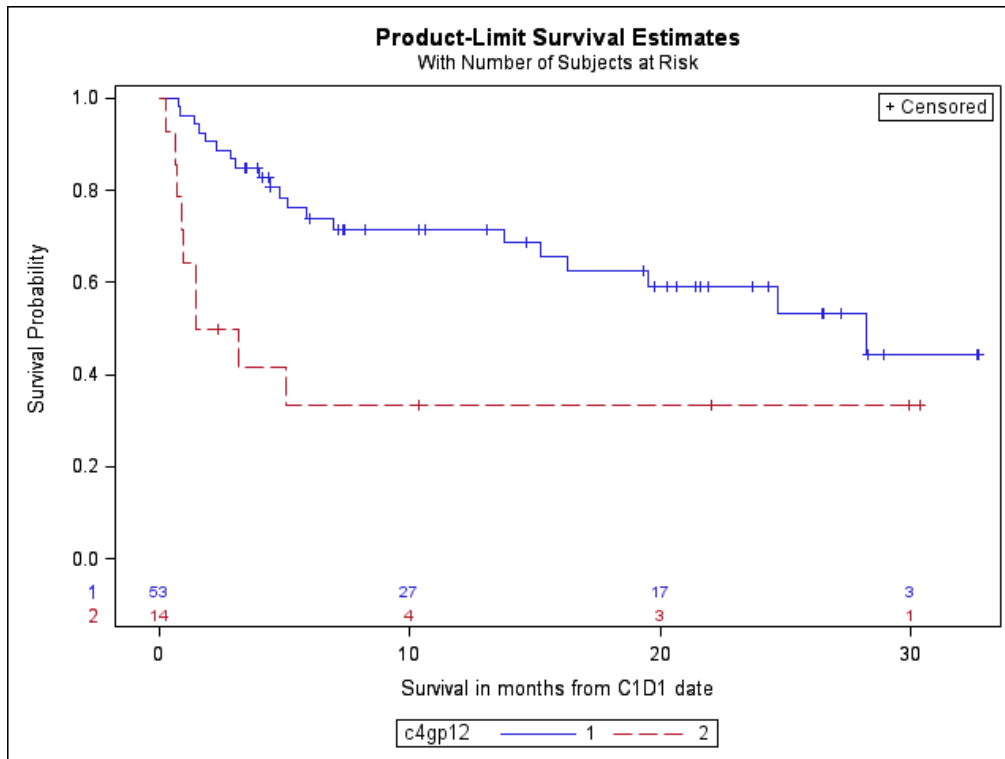

Unadjusted  $p = 0.0098$ ; adjusted  $p = 0.020$  (after adjusting for 2 possible combinations and reporting the  $p$  value for the greater difference between groups formed).

**E) Cluster D, C2D1, OS,  $p=0.048$**

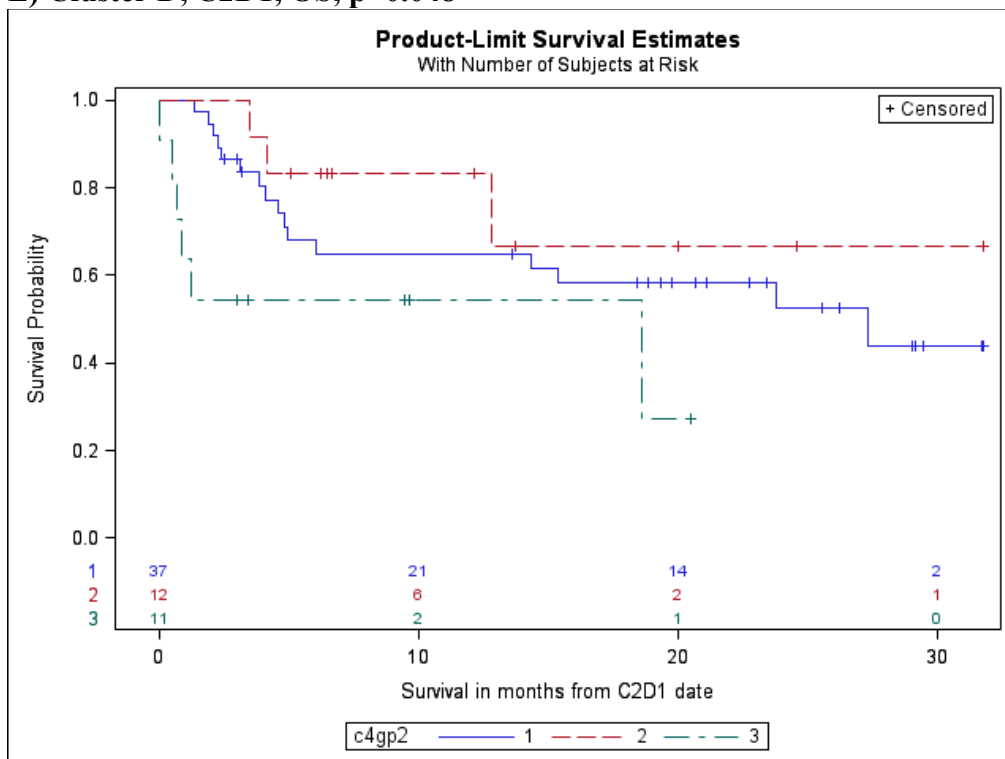

1 vs. 2:  $p = 0.72$ , 1 vs. 3:  $p = 0.19$ , 2 vs. 3:  $p = 0.035$ . 1 and 2 can be pooled and the combination tested against 3.

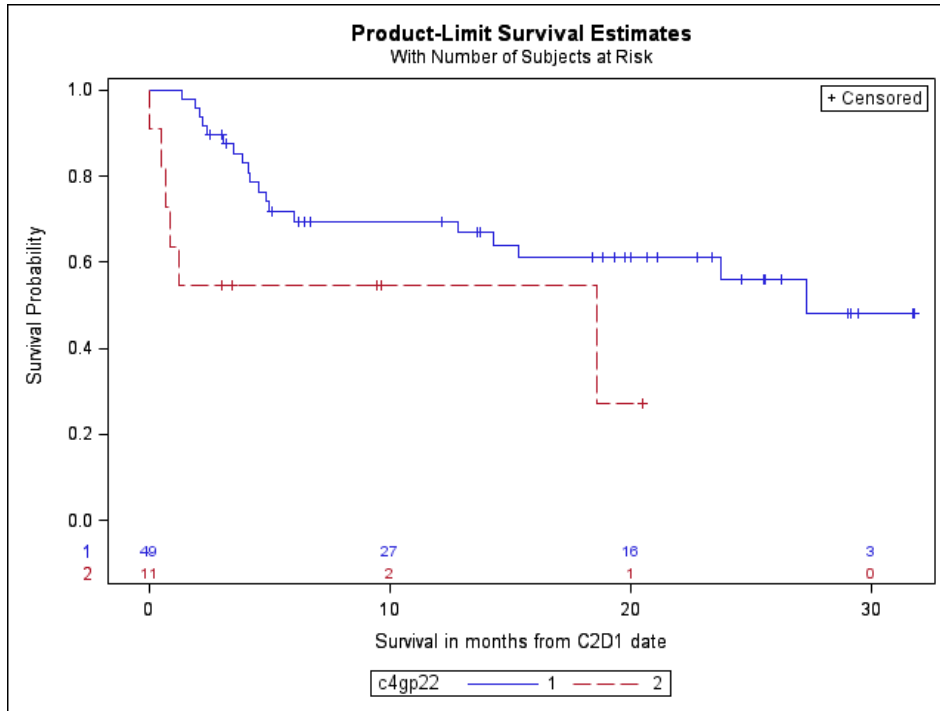

Unadjusted  $p = 0.024$ ; adjusted  $p = 0.048$  (after adjusting for 2 possible combinations and reporting the  $p$  value for the greater difference between groups formed).

**F) Cluster D, C3D1, OS,  $p=0.037$**

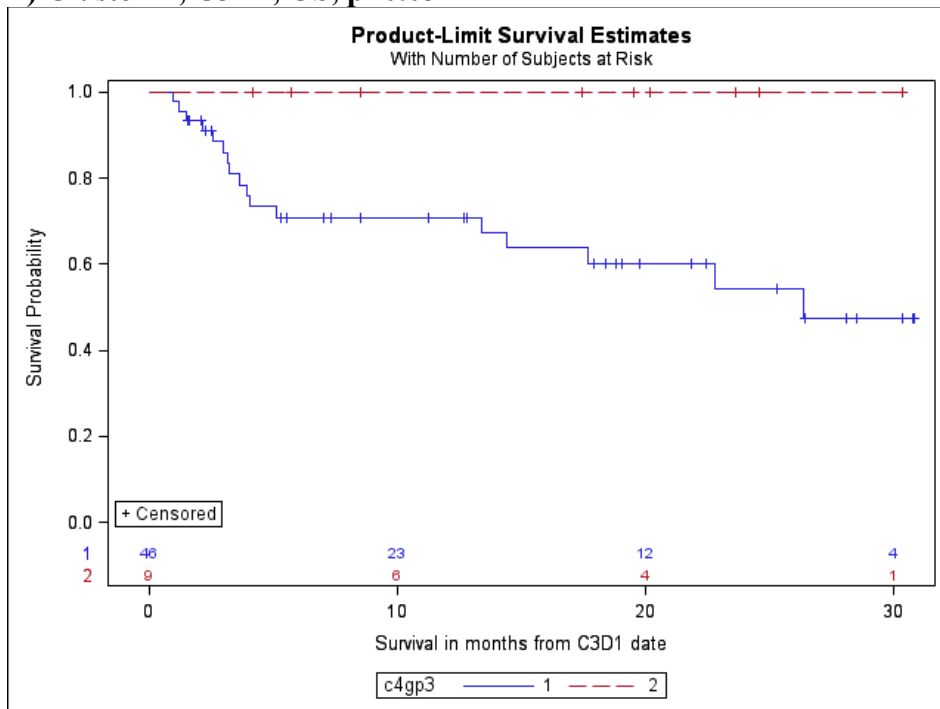

**Supplementary Table 1.** Enrichment analysis for each CTC subtype (urothelial vs. other patients)

| Baseline   | Subtype A | Other subtypes | Subtype B | Other subtypes | Subtype C | Other subtypes | Subtype D | Other subtypes | Subtype E | Other subtypes |
|------------|-----------|----------------|-----------|----------------|-----------|----------------|-----------|----------------|-----------|----------------|
| Urothelial | 13        | 33             | 5         | 41             | 9         | 37             | 10        | 36             | 0         | 46             |
| Other      | 7         | 14             | 0         | 21             | 3         | 18             | 4         | 17             | 2         | 19             |
| Chi.sqr    | 0.177     |                | 2.46      |                | 0.27      |                | 0.063     |                | 4.51      |                |
| pval       | 0.67      |                | 0.11      |                | 0.6       |                | 0.8       |                | 0.03      |                |
| Baseline   | Subtype A | Other subtypes | Subtype B | Other subtypes | Subtype C | Other subtypes | Subtype D | Other subtypes | Subtype E | Other subtypes |
| Urothelial | 13        | 27             | 6         | 36             | 10        | 30             | 11        | 29             | 1         | 39             |
| Other      | 6         | 14             | 0         | 20             | 2         | 18             | 2         | 18             | 0         | 20             |
| Chi.sqr    | 0.038     |                | 3.16      |                | 1.875     |                | 2.4       |                | 0.508     |                |
| pval       | 0.84      |                | 0.075     |                | 0.17      |                | 0.12      |                | 0.47      |                |
| Baseline   | Subtype A | Other subtypes | Subtype B | Other subtypes | Subtype C | Other subtypes | Subtype D | Other subtypes | Subtype E | Other subtypes |
| Urothelial | 9         | 25             | 0         | 34             | 7         | 27             | 4         | 30             | 1         | 33             |
| Other      | 5         | 17             | 0         | 22             | 3         | 19             | 0         | 22             | 0         | 22             |
| Chi.sqr    | 0.099     |                | NaN       |                | 0.44      |                | 2.78      |                | 0.65      |                |
| pval       | 0.75      |                | NaN       |                | 0.507     |                | 0.095     |                | 0.41      |                |

**Supplementary Table 2. Prevalence of CTC subtypes at each time point**

|                   | Baseline/C1D1 |                | C2D1          |                 | C3D1          |                 |
|-------------------|---------------|----------------|---------------|-----------------|---------------|-----------------|
| <b>Prevalence</b> | N (%)         | median (range) | N (%)         | median (range)  | N (%)         | median (range)  |
| Subtype A         | 36/67 (53.73) | 0.44 (0,69.33) | 36/60 (60.00) | 0.473 (0,27.04) | 32/56 (57.14) | 0.393 (0,6.013) |
| Subtype B         | 9/67 (13.43)  | 0 (0,101.6)    | 13/60 (21.67) | 0 (0,30.5)      | 7/56 (12.50)  | 0 (0,0.8)       |
| Subtype C         | 24/67 (35.82) | 0 (0,74.53)    | 25/60 (41.67) | 0 (0,35.36)     | 19/56 (33.93) | 0 (0,12)        |
| Subtype D         | 29/67 (43.28) | 0 (0,45.76)    | 23/60 (38.33) | 0 (0,29.96)     | 9/56 (16.07)  | 0 (0,2.4)       |
| Subtype E         | 9/67 (13.43)  | 0 (0,1.386)    | 9/60 (15.00)  | 0 (0,2.08)      | 3/56 (5.36)   | 0 (0,1.293)     |

**Supplementary Table 3.** Proportion of CTC subtypes at each time point

| <b>Proportion %</b> | <b>Baseline/C1D1</b> | <b>C2D1</b> | <b>C3D1</b> |
|---------------------|----------------------|-------------|-------------|
| Subtype A           | 39                   | 32          | 44          |
| Subtype B           | 23                   | 13          | 4           |
| Subtype C           | 20                   | 25          | 41          |
| Subtype D           | 17                   | 29          | 10          |
| Subtype E           | 1                    | 1           | 1           |
